# Supplementary material
Source: Elsevier journal article supplement (https://www.sciencedirect.com/science/article/pii/S0213005X20304134)
Supplement: mmc1 [file S0213005X20304134:mmc1.pdf]

## Supplementary Material

**Table S1.** Virological outcomes. Patients with PCR negative for SARS-CoV-2 in nasal and oropharyngeal swabs over time from baseline in treatment group and in control group by number of PCR performed.

| PCR number | Time (days), median (min-max) | HCQ group | Control group | Difference, % (95% CI) | p-value |
|------------|-------------------------------|-----------|---------------|------------------------|---------|
| 2          | 7 (5 – 9)                     | 21 (25.6) | 7 (14.3)      | 11.3 (-2.3 – 24.9)     | 0.126   |
| 3          | 10 (7 – 16)                   | 37 (43.5) | 18 (36.0)     | 7.5 (-9.4 – 24.5)      | 0.390   |
| 4          | 15 (12 – 19)                  | 52 (61.2) | 24 (47.1)     | 14.1 (-3.1 – 31.3)     | 0.108   |
| 5          | 22 (19 – 27)                  | 68 (80.0) | 37 (71.2)     | 8.8 (-6.1 – 23.8)      | 0.235   |
| 6          | 28 (25 – 32)                  | 78 (91.7) | 49 (94.2)     | -2.5 (-11.1 – 6.2)     | 0.590   |

Data are n (%) unless stated otherwise.

## Supplementary Material - 2

**Table S2.** Virological outcomes. Patients with high-moderate viral load for SARS-CoV-2 (N1 Ct value < 35) in nasal and oropharyngeal swabs over time from baseline in treatment group or control group by number of PCR performed.

| PCR number | Time (days), median (min-max) | HCQ group | Control group | Difference, % (95% CI) | p-value |
|------------|-------------------------------|-----------|---------------|------------------------|---------|
| 1          | -2 (-4 – -1)                  | 62 (81.6) | 41 (80.4)     | 1.2 (-12.8 – 15.1)     | 0.867   |
| 2          | 7 (5 – 9)                     | 24 (30.4) | 10 (23.3)     | 7.1 (-9.1 – 23.3)      | 0.402   |
| 3          | 10 (7 – 16)                   | 8 (9.9)   | 9 (19.2)      | -9.3 (-22.3 – 3.7)     | 0.136   |
| 4          | 15 (12 – 19)                  | 3 (3.6)   | 4 (7.8)       | -4.2 (-12.6 – 4.2%)    | 0.428   |
| 5          | 22 (19 – 26)                  | 0         | 3 (6.0)       | -6.0 (-12.6 – 5.8%)    | 0.054   |
| 6          | 29 (25 – 32)                  | 0         | 0             | -                      | -       |

Data are n (%) unless stated otherwise.

### Supplementary Material-3

**Table S3.** Virological outcomes. Kaplan-Meier probability of negative conversion of SARS-CoV-2 PCR for each specific day.

| Day | HCQ group          | Control group      | Difference,<br>% (95% CI) | p-value |
|-----|--------------------|--------------------|---------------------------|---------|
| 7   | 16.1 (9.9 – 25.7)  | 10.9 (5.1 – 22.7)  | 5.2 (-6.1 – 16.5)         | 0.392   |
| 10  | 33.3 (24.5 – 44.3) | 21.8 (13.0 – 35.2) | 11.5 (-3.2 – 26.3)        | 0.147   |
| 14  | 48.8 (38.8 – 59.8) | 40.4 (28.8 – 54.7) | 8.4 (-8.4 – 25.2)         | 0.337   |
| 21  | 66.7 (56.6 – 76.4) | 48.0 (35.7 – 62.0) | 18.7 (2.0 – 35.4)         | 0.034   |
| 28  | 86.0 (77.7 – 92.5) | 85.8 (74.9 – 93.7) | 0.2 (-12.0 – 12.4)        | 0.976   |

Data are % (95% CI).
